RESEARCH ARTICLE

# Exploration of the decontamination of common nonmetallic materials by Ce(IV)/HNO<sub>3</sub>

Jianzhu Pan<sup>1</sup>, Jiaxiang Long<sup>2</sup>, Guangnai Ma<sup>3\*</sup>, Sheng Li<sup>4\*</sup>

**1** Pharmaceutical Department, West China Hospital of Sichuan University, Chengdu, Sichuan, China, **2** Clinical Engineering Department, Guizhou Daqin Cancer Hospital, Guiyang, Guizhou, China, **3** Analytical Testing Center, Guizhou Ruidan Radiation Detection Technology Co., Ltd., Guiyang, Guizhou, China, **4** School of Nuclear Science and Technology, University of South China Hengyang, Hunan, China

\* [24502007@qq.com](mailto:24502007@qq.com) (GM); [775814057@qq.com](mailto:775814057@qq.com) (SL)

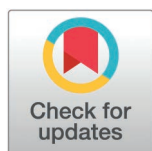

## OPEN ACCESS

**Citation:** Pan J, Long J, Ma G, Li S (2025) Exploration of the decontamination of common nonmetallic materials by Ce(IV)/HNO<sub>3</sub>. PLoS One 20(9): e0322683. <https://doi.org/10.1371/journal.pone.0322683>

**Editor:** Sadia Ilyas, Hanyang University - Seoul Campus: Hanyang University, KOREA, REPUBLIC OF

**Received:** March 31, 2025

**Accepted:** August 6, 2025

**Published:** September 8, 2025

**Peer Review History:** PLOS recognizes the benefits of transparency in the peer review process; therefore, we enable the publication of all of the content of peer review and author responses alongside final, published articles. The editorial history of this article is available here: <https://doi.org/10.1371/journal.pone.0322683>

**Copyright:** © 2025 Pan et al. This is an open access article distributed under the terms of the [Creative Commons Attribution License](https://creativecommons.org/licenses/by/4.0/), which permits unrestricted use, distribution,

## Abstract

With the rapid development of the nuclear medicine business worldwide, the removal of iodine-131 from specific contaminated environments to protect public health has important application prospects. In this study, the surface decontamination mechanism of Ce(IV)/HNO<sub>3</sub> as a decontaminant for iodine-131-contaminated nonmetallic materials was investigated by using an orthogonal experimental method and scanning electron microscopy (SEM). During the preparation experiments with the contaminated materials, both quartz glass and ceramics reached peak activity concentration levels at 4 h of adsorption (contamination) by using immersion; the decontamination factor (DF) was selected as the test index for the decontamination experiments. The influence order of temperature, Ce(IV) concentration, HNO<sub>3</sub> concentration and decontamination time on the decontamination factor (DF) was investigated with an orthogonal test and extreme difference analysis. The optimal combination of factors under the set experimental conditions was obtained after a comprehensive analysis. The optimal combination for quartz glass was a decontamination time of 2.0 h > temperature of 60°C > Ce(IV) concentration of 0.02 mol/L > HNO<sub>3</sub> concentration of 1.5 mol/L; the optimal combination for the ceramic sheet was a Ce (IV) concentration of 0.02 mol/L > temperature of 80°C > decontamination time of 1 h > HNO<sub>3</sub> concentration of 2.0 mol/L. Additionally, from the SEM analysis, the material surface decontamination process removed the surface iodine-131 and the highly accumulated organic substances; overall, a better decontamination effect was achieved.

## 1 Introduction

While recent advances in radioactive decontamination have yielded promising materials like iodine-capture polymers [1] and nanostructured cerium composites [2], critical gaps remain in practical application to nonmetallic surfaces. Our study provides three key innovations:

and reproduction in any medium, provided the original author and source are credited.

**Data availability statement:** The minimal data-set required to replicate our findings is publicly available on Figshare under the following DOI: Project Title: Exploration of the decontamination of common nonmetallic materials by Ce(IV)/HNO<sub>3</sub> DOI: [<https://doi.org/10.6084/m9.figshare.29964251>] Stable URL: [<https://doi.org/10.6084/m9.figshare.29964251>].

**Funding:** The author(s) received no specific funding for this work.

**Competing interests:** The authors have declared that no competing interests exist.

1. **Material-Specific Optimization:** Unlike broad-spectrum approaches [1,2], we establish the first quantitative framework for Ce(IV)/HNO<sub>3</sub> application to quartz and ceramics – the dominant materials in nuclear medicine infrastructure.
2. **Process Efficiency:** Compared to conventional methods requiring 6–8 hours [3], our optimized conditions achieve superior decontamination factors (DF = 8.14–19.52) in just 1–2 hours.
3. **Mechanistic Insights:** We elucidate distinct surface interaction mechanisms (Figs 1–5) that explain why ceramics require higher HNO<sub>3</sub> concentrations than quartz – a phenomenon not previously documented in literature [1–3].

This work bridges the gap between laboratory-scale developments [2] and real-world decontamination needs, particularly for:

Medical devices (quartz viewing windows)  
Reactor components (ceramic linings)

With the rapid development of the nuclear medicine business worldwide, iodine-131 contamination is particularly prominent as the most widely used nuclide in clinical practice. Given the critical need to remove iodine-131 from contaminated environments for public health protection, current traditional decontamination methods demonstrate less-than-optimal performance, necessitating the development of more efficient chemical approaches [4–8].

In this study, quartz glass (SiO<sub>2</sub> ≥ 99.9%) and ceramics (85% Al<sub>2</sub>O<sub>3</sub>, 10% Mg-silicate) were selected as representative nonmetallic materials for the following reasons:

**Prevalence in Nuclear Facilities:** Quartz glass is widely used in radiation shielding windows and diagnostic equipment due to its transparency and resistance to radiation damage, while ceramics are common in reactor linings and laboratory surfaces owing to their thermal stability and mechanical strength [9–13].

**Chemical Stability:** Both materials exhibit low reactivity with iodine-131 under normal conditions, allowing focused study on decontamination mechanisms rather than material degradation.

**Structural Contrast:** The amorphous SiO<sub>2</sub> surface of quartz glass contrasts sharply with the porous Al<sub>2</sub>O<sub>3</sub>-rich ceramic matrix, enabling comparative analysis of adsorption and decontamination efficiency.

Future studies could extend this method to other nonmetallic materials (e.g., polymers or concrete), which are also vulnerable to radioactive contamination in nuclear waste handling [1–3,9,12].

With less-than-optimal decontamination by using traditional physical methods, experimental decontamination experiments using chemical methods have emerged, and many scientists have conducted a variety of studies on chemical decontamination methods and decontamination materials. The AWUAL group has studied different applications based on their specific functionality and surface area, including biodegradable polymers. The efficient coating of toxic dyes in wastewater by adsorbents [14], enhanced detection and removal of copper from wastewater by novel surface composite adsorbents [15], and optical detection and recovery of Yb(III) in waste

samples by novel sensor-integrated nanomaterials [16] have been studied. Rana S et al. investigated the effectiveness and safety of optimized wash formulations for radioactive decontamination [17]. Bihi A et al. evaluated the various decontamination products for radionuclides [18]. Vogg H conducted experimental studies on decontamination of ground and fire-polished glass surfaces [19]. Schmitz J studied the decontamination effect of commercial and laboratory detergents [20]. Mnasri N, Charnay C, de Ménorval L C et al. studied the decontamination effect of submicron mesoporous silver nanoparticle-containing silica systems containing silver nanoparticles for iodine encapsulation and gas phase immobilization [21].

Ce(IV) decontamination technology was originally proposed by Westinghouse [22], and Ce(IV)/nitric acid decontamination technology utilizes the strong oxidizing property of Ce(IV) in nitric acid solution, which can dissolve the metal surface oxide layer or metal matrix to achieve decontamination [23,24]. Due to its excellent performance, it is considered to be an effective and easy-to-implement decontamination method [25] and thus has received much attention from various countries [18–25]. Mathieu P et al. reported on an effective method to reduce the amount of metal waste from disassembled materials [26]. Tan Zhaoyi et al. studied the decontamination activities of metal parts in the decommissioning of a fire alarm production line [27]. A preliminary study on the safety of Ce(IV)/HNO<sub>3</sub> decontamination technology in engineering applications was carried out by Ma Pengxun et al. [28]. Ponne M studied thorough chemical decontamination with the MEDOC process and examined the use of Ce(IV) and ozone decontamination technology with MEDOC for laboratory to industrial applications [23,29]; Ren Xianwen et al. described the decontamination techniques and equipment for radioactive decontaminated metals [30]. Hoppe et al. discovered a method to remove surface contamination from ultrapure copper spectrometer components [31]. Ma Guangnai et al. performed a study on the extraction of Ce(IV) from nitric acid media using triisopentyl phosphate [32]. In addition to metals being contaminated, many nonmetallic materials are contaminated in radiation workplaces, such as ceramic products and quartz glass [9–13].

In this study, an exploratory application of Ce(IV)/HNO<sub>3</sub> was used to study the radioactive decontamination of quartz glass and ceramic tiles, and the decontamination factor (DF) was used to characterize the decontamination effect [33]. The decontamination test for a single influence factor can often obtain a more desirable treatment effect but not an optimal integrated treatment effect [34]; there are many factors affecting the decontamination treatment effect, and the main influencing factors are [35,36] temperature, Ce(IV) concentration, HNO<sub>3</sub> concentration, and decontamination time. These factors have different effects on different decontamination receptors. Therefore, it is necessary to investigate the influence of each influencing factor on the decontamination target and obtain the optimal level combination of each factor.

Ce(IV)/HNO<sub>3</sub> was used for the decontamination of quartz glass and ceramic chips, and the decontamination effect of the two materials was investigated by orthogonal experiments, scanning electron microscopy (SEM) and energy-dispersive X-ray spectrometry (EDS). The main elements of quartz glass and ceramics include Si, Al, and O, which account for 90% of the total amount in the Earth's crust. Because of their widespread use in many production fields and real world applications, quartz glass and ceramics are important to study due to their particular use in radionuclide applications.

## 2. Experiment

### 2.1 Reagents and apparatus

The experimental contamination solution was prepared by diluting the Na<sup>131</sup>I stock solution with a radioactivity concentration of  $1.15 \times 10^{11}$  Bq/L (3.12 Ci/L) by 10,000 times with deionized water. Nitric acid (analytical purity) was purchased from Guangzhou Jinhua Da Chemical Reagent Co. Ltd. The nitric acid solution, Ce(IV) solution and anhydrous ethanol used in the experiment were measured by the total  $\beta$ -radioactivity concentration, and the measurement results were within the statistical rise and fall of the measurement background, which did not affect the experimental data.

**Validation Methodology:** The LB-4  $\beta$ -counting system was selected for quantification due to: 1) High sensitivity (detection limit  $\sim 0.05$  Bq for  $^{131}\text{I}$ ) 2) Excellent signal-to-background ratio ( $\beta \leq 1$  CPM background) 3) Direct correlation with radioactivity ( $^{90}\text{Sr}$ - $^{90}\text{Y}$  detection efficiency  $\geq 65\%$ )

EDS analysis, while useful for elemental mapping, has inherent limitations

Detection threshold ( $\sim 0.1$ – $1$  at %) is orders of magnitude higher than iodine-131's trace concentration ( $\sim 10^{-11}$  mol/L)

Cannot distinguish radioisotopes from stable isotopes

Thus,  $\beta$ -counting served as the definitive validation method, while EDS provided supplementary surface characterization.

**Instrumentation:** A low background total  $\alpha$ , total  $\beta$  measuring instrument (LB-4 type, Beijing High Energy Cody Technology Co., Ltd) was used with a background count rate of  $\alpha \leq 0.05$  CPM ( $0.0017$  CPM/cm<sup>2</sup>) and  $\beta \leq 1$  CPM ( $0.053$  CPM/cm<sup>2</sup>) and a detection efficiency ( $\beta$  source) of  $^{90}\text{Sr}$ - $^{90}\text{Y}$   $\geq 65\%$  ( $2\pi$ ). A digital display electric heating drying oven (202-0A type Ltd.) was used. A digital display thermostatic water bath (HH-4 type, Shanghai Lichen Instrument Technology Co.) was used with a temperature control range of  $RT \sim 100^\circ\text{C}$ , temperature control accuracy of  $\leq \pm 1^\circ\text{C}$ , and temperature rise speed from room temperature to boiling point  $\leq 70$  min].

## 2.2 Experimental details

The selected quartz glass is a single-component amorphous material of silica and contained  $\text{SiO}_2 \geq 99.9\%$ ; the ceramic contained  $85\%$   $\text{Al}_2\text{O}_3$ ,  $10\%$  aqueous magnesium silicate (molecular formula:  $\text{Mg}_3[\text{Si}_4\text{O}_{10}](\text{OH})_2$ ) and  $5\%$  vitreous  $\text{SiO}_2$ .

The test preparation specifications were  $\phi 45$  mm, thickness of  $0.5$  mm, quartz glass and ceramic tablets. The initial specimen was soaked in anhydrous ethanol for  $2$  h, then removed and placed into the desiccator natural to air dry. The air dried the experimental specimens were placed into a sequentially numbered stainless steel measurement plate; the plate with the specimens were then placed into the low background total  $\alpha$ , total  $\beta$  measurement instrument to measure the background of each numbered experimental specimen; a measurement time of  $3$  h was used to obtain the total contamination of each specimen. Then, the test pieces used for the same group of decontamination experiments were placed into beakers containing the same batch of equal amount of iodine-131 contamination solution for a certain period of time. The test pieces were removed and the residual iodine-131 contamination solution on the surface of the test pieces were rinsed off with deionized water; the rinsed test pieces were placed into a constant temperature drying oven at  $110^\circ\text{C}$  for  $15$  min, then removed and cooled to room temperature in a desiccator. The total  $\beta$  measurement was performed on each sample to be decontaminated, and the total count rate of each sample to be decontaminated was recorded as  $N_0$  (CPM).

The decontaminant was prepared based on the set conditions and placed in a petri dish of the same diameter according to a certain volume. The samples to be decontaminated were soaked for a period of time according to the set experimental protocol; the samples were then removed and the surface of the decontaminant was rinsed off with deionized water. After, the samples were dried in an oven at  $110^\circ\text{C}$  for  $15$  min and cooled to room temperature in a desiccator;  $\beta$  measurements were performed to record the total count rate after decontamination  $N_t$  (CPM). The test surface remained on the same side throughout the process in order to prevent damage to the test surface.

Under static decontamination conditions, seven identical containers were selected and the specimens to be decontaminated were placed into each container (specimen coding side up); decontaminants with concentrations of  $0.01$  mol/L  $\text{Ce(IV)}$  and  $1.0$  mol/L  $\text{HNO}_3$  were added slowly at the top. For the selected  $7$  groups of ceramic specimens with a similar degree of contamination, their  $\beta$  radioactivity was recorded as  $N_0$  (i), where  $i$  corresponded to specimen number  $1$ – $7$ ; after placing the ceramic specimens in a container and adding the decontaminant liquid to a specific surface height  $H_L$  ( $2$ ,  $4$ ,  $6$ ,  $8$ ,  $10$ ,  $15$ , and  $20$  mm) to decontaminate the each sample for  $1$  h, the specimens were then removed, rinsed with deionized water, placed into  $110^\circ\text{C}$  constant temperature drying oven  $15$  min, removed and cooled to room temperature, and finally placed into the total  $\alpha/\beta$  measuring instrument to measure  $N_t$  (i). [Equation \(1\)](#) was used to determine the decontamination factor (DF) of  $7$  groups of test pieces.

## 2.3 Decontamination factor

The main purpose of radioactive decontamination is to reduce the radiation in the decontaminated equipment and devices to the normal level of dose rates allowable for personnel and to maintain the equipment performance similar to its original performance with the following main features [37]. For decontaminated equipment and devices, the integrity of their structure and function should be ensured and not affect their continued use. Repeated contamination during the subsequent application using the decontaminated equipment and devices should be suppressed. A decontamination device is used at an environmental protection facility heavily and repeatedly; it needs to be set permanently and used at any time.

The decontamination factor is an indicator of the degree of removal of certain radioactive impurities from the decontamination separation process; this process is the removal of radioactive substances deposited on the internal and external surfaces of nuclear facility structures, materials and equipment by using chemical or physical methods. In the experimental process, we choose the DF to determine the decontamination effect, which is the level of radioactivity before decontamination divided by the level of radioactivity after decontamination; the value of the background radioactivity level of the test piece is deduced, and the DF is calculated as follows [6]:

$$DF = \frac{(N_0 - N_b)}{(N_t - N_b)} \quad (1)$$

where  $N_b$  is the sample material background  $\beta$ -count rate, CPM;  $N_0$  is the  $\beta$ -count rate before decontamination, CPM; and  $N_t$  is the  $\beta$ -count rate after decontamination, CPM.

## 2.4 Orthogonal experimental protocol design

An orthogonal experiment is a multifactor and multilevel design method. The  $L_{16}(4^4)$  orthogonal array was specifically selected for this study due to its following advantages:

**Efficiency:** It allows simultaneous investigation of four factors (temperature, Ce(IV) concentration,  $\text{HNO}_3$  concentration, and time) at four levels each with only 16 experimental runs, significantly reducing resource requirements while maintaining statistical validity.

**Balance:** Each factor level appears equally often (four times) in the array, ensuring balanced comparisons.

**Orthogonality:** Factors can be evaluated independently without confounding effects, as guaranteed by Galois field theory [38].

This design is particularly suitable for preliminary optimization studies where the goal is to identify dominant factors and their optimal ranges before more detailed investigations.

These limitations notwithstanding, the orthogonal array remains ideal for first-stage factor screening. While this approach provides robust preliminary optimization, it has inherent limitations:

### 1. Interaction Effects:

- Cannot fully characterize nonlinear factor interactions
- Limited resolution for detecting second-order effects

### 2. Optimal Precision:

- Identifies parameter ranges rather than exact optima
- Requires verification experiments for final confirmation

For advanced optimization, Response Surface Methodology (RSM) with Central Composite Design is recommended to:

1. Model complex response surfaces
2. Quantify interaction terms

### 3. Identify true optima with statistical confidence [39,40,41]

Based on Galois theory [38], some representative level combinations are selected from comprehensive experiments, experiments are conducted, and the best level combinations are derived through analysis. Based on the many factors affecting the decontamination effect, the orthogonal experimental method was selected to determine the best decontamination process conditions in this experiment. Temperature (°C), Ce(IV) concentration (mol/L), HNO<sub>3</sub> concentration (mol/L), and decontamination time (h) were used as the test factors, four factors (A, B, C, D) and four levels (1, 2, 3, 4) were set as the test indexes, and an L16(4<sup>4</sup>) orthogonal table was used to arrange the experiment Table 1 [32]. The experimental scheme is shown in Table 2.

## 3. Results and discussion

### 3.1 Adsorption (contamination) time

The variation in the  $\beta$  count rate (CPM) of the specimens was determined by the difference in the contamination time; the test specimens were taken for 6 time periods of 0/0.5/1.0/2.0/4.0/8.0 during the experiment. The measurement results are shown in Table 3.

Table 1. Orthogonal experimental factor level table [32].

| level | factors            |                               |                                          |            |
|-------|--------------------|-------------------------------|------------------------------------------|------------|
|       | A Temperature (°C) | B Ce(IV)concentration (mol/L) | C HNO <sub>3</sub> concentration (mol/L) | D Time (h) |
| 1     | 20                 | 0.01                          | 1.0                                      | 0.5        |
| 2     | 40                 | 0.02                          | 1.5                                      | 1.0        |
| 3     | 60                 | 0.05                          | 2.0                                      | 2.0        |
| 4     | 80                 | 0.1                           | 2.5                                      | 3.0        |

<https://doi.org/10.1371/journal.pone.0322683.t001>

Table 2. Orthogonal experimental protocols.

| Test number | A Temperature (°C) | B Ce(IV)concentration (mol/L) | C HNO <sub>3</sub> concentration (mol/L) | D Time (h) | DF |
|-------------|--------------------|-------------------------------|------------------------------------------|------------|----|
| 1           | 1                  | 1                             | 1                                        | 1          |    |
| 2           | 1                  | 2                             | 2                                        | 2          |    |
| 3           | 1                  | 3                             | 3                                        | 3          |    |
| 4           | 1                  | 4                             | 4                                        | 4          |    |
| 5           | 2                  | 1                             | 2                                        | 3          |    |
| 6           | 2                  | 2                             | 1                                        | 4          |    |
| 7           | 2                  | 3                             | 4                                        | 1          |    |
| 8           | 2                  | 4                             | 3                                        | 2          |    |
| 9           | 3                  | 1                             | 3                                        | 4          |    |
| 10          | 3                  | 2                             | 4                                        | 3          |    |
| 11          | 3                  | 3                             | 1                                        | 2          |    |
| 12          | 3                  | 4                             | 2                                        | 1          |    |
| 13          | 4                  | 1                             | 4                                        | 2          |    |
| 14          | 4                  | 2                             | 3                                        | 1          |    |
| 15          | 4                  | 3                             | 2                                        | 4          |    |
| 16          | 4                  | 4                             | 1                                        | 3          |    |

<https://doi.org/10.1371/journal.pone.0322683.t002>

**Table 3. Measurement results of the  $\beta$  count rate (CPM) of the contamination experiment.**

| materials    | time(h) |       |        |        |        |        |
|--------------|---------|-------|--------|--------|--------|--------|
|              | 0       | 0.5   | 1      | 2      | 4      | 8      |
| quartz glass | 6.82    | 383.7 | 452.3  | 491.2  | 978.5  | 857.4  |
| ceramic      | 8.12    | 587.9 | 1288.0 | 1698.6 | 3242.5 | 2995.1 |

\*\*Adsorption Mechanism and Time Dependency\*\*.

<https://doi.org/10.1371/journal.pone.0322683.t003>

The observed peak adsorption at 4 hours is consistent with previous studies on iodine-131 interaction with silica and alumina surfaces [9,13]. This time-dependent behavior can be attributed to:

**1. Surface Chemistry:** Quartz glass ( $\text{SiO}_2$ ) primarily interacts with iodine via physisorption to surface silanol groups ( $\text{Si-OH}$ ), while ceramics ( $\text{Al}_2\text{O}_3/\text{Mg-silicate}$ ) exhibit additional ion-exchange capacity due to structural hydroxyl sites [10,13].

## 2. Kinetic Factors:

The initial rapid adsorption (0–2 h) represents surface site saturation

The peak at 4 h indicates equilibrium between adsorption and desorption processes

The subsequent decrease (8 h) may reflect surface rearrangement or weak bond dissociation [12] Fig 1.

**3. Material Differences:** The higher adsorption capacity of ceramics (3242.5 vs 978.5 CPM) aligns with their greater surface area and  $\text{Al}_2\text{O}_3$  content, which provides more active sites for iodine binding [9].

As shown in Table 3 and Fig 3, both quartz glass and ceramic flakes reached peak  $\beta$  count rates of 878.5 CPM and 3242.5 CPM at 4 h. In the subsequent experiments, a contamination (adsorption) time of 4 h was selected for the preparation of contaminated specimens.

## 3.2 Analysis of decontaminant liquid level

For the ceramic specimens that were placed in the containers with a 4 h contamination time and after  $\beta$  measurements to obtain their Nb (i) values, the decontaminant level heights  $H_L$  were 2, 4, 6, 8, 10, 15, and 20 mm with decontamination

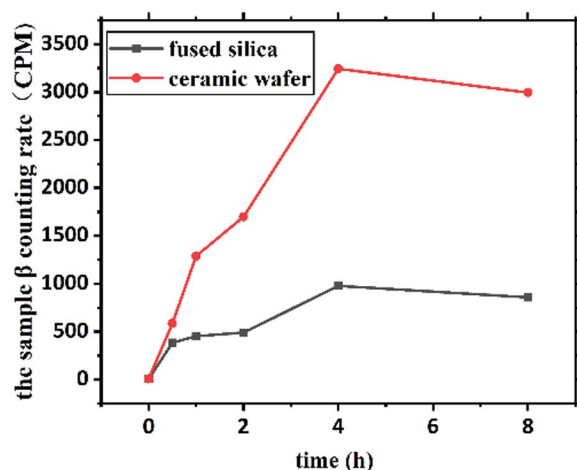

**Fig 1. Contamination effect versus time.**

<https://doi.org/10.1371/journal.pone.0322683.g001>

for 1 h; the specimens were then removed, rinsed with deionized water, placed into a 110°C constant temperature drying oven for 15 min, removed and cooled to room temperature. The total  $\alpha/\beta$  measurement instrument was used to measure Nt (i) of these samples; Equation (1) was used to calculate the DF values for the 7 groups of specimens (Table 4). Fig 2 shows the relationship between the decontamination factor and decontaminant level height.

From Table 4 and Fig 2, the decontamination factor could no longer change rapidly after plateaued when the decontaminant level reached 10 mm. Accordingly, this decontaminant liquid level  $H_L$  of 10 mm was chosen for subsequent experiments to minimize the generation of decontamination waste liquid, indicating the establishment of This phenomenon can be explained by:

1. **Diffusion Limitations:** Below 10 mm, the liquid height limits Ce(IV) ion transport to the material surface – At  $\geq 10$  mm, the diffusion distance becomes negligible compared to reaction rates, achieving maximum DF – This matches Fick's law predictions where flux becomes concentration-independent at sufficient heights [35].

## 2. Material-Specific HNO<sub>3</sub> Dependence:

The higher HNO<sub>3</sub> requirement for ceramics (2.0 vs 1.5 mol/L) reflects:

Al<sub>2</sub>O<sub>3</sub> 's amphoteric nature needing stronger acid to protonate surface sites [35]

Mg-silicate components requiring acid-driven Mg<sup>2+</sup> leaching to expose new reaction sites Table 5.

The choice of 10 mm liquid height effectively balances decontamination efficiency with waste minimization, particularly important for radioactive applications.

Table 4. Table of measurement results of beta count rate (CPM) for contamination experiments.

| materials | Liquid level/ $H_L$ (mm) |       |        |        |        |        |
|-----------|--------------------------|-------|--------|--------|--------|--------|
|           | 0                        | 0.5   | 1      | 2      | 4      | 8      |
| ceramic   | 8.12                     | 587.9 | 1288.0 | 1698.6 | 3242.5 | 2995.1 |

<https://doi.org/10.1371/journal.pone.0322683.t004>

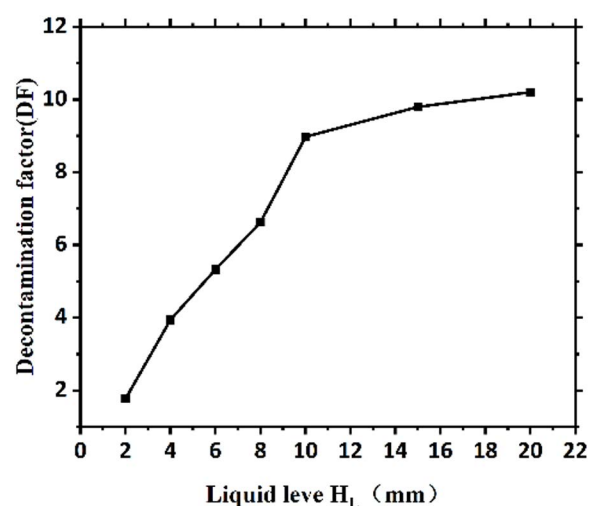

Fig 2. Graph of decontamination factor versus decontaminant level (The diameter of the inner section of the container for decontamination is fixed at  $\phi = 75$  mm, and the trend shown is equivalent to the graph of decontamination factor DF versus decontaminant volume.).

<https://doi.org/10.1371/journal.pone.0322683.g002>

**Table 5. Material-Specific HNO<sub>3</sub> Dependence [35].**

| Property                 | Quartz Glass (SiO <sub>2</sub> ) | Ceramic (Al <sub>2</sub> O <sub>3</sub> /Mg-silicate) |
|--------------------------|----------------------------------|-------------------------------------------------------|
| Optimal HNO <sub>3</sub> | 1.5 mol/L                        | 2.0 mol/L                                             |
| Surface Groups           | Si-OH (weak acid)                | Al-OH (amphoteric)                                    |
| Key Mechanism            | Oxidative dissolution            | Acid-assisted ion exchange                            |

<https://doi.org/10.1371/journal.pone.0322683.t005>

### 3.3 Experimental results and analysis of extreme differences

The experimental results of decontamination factors for each group of experiments are shown in [Table 6](#), with triplicate measurements demonstrating high reproducibility (<5% relative standard deviation).

#### Statistical analysis

##### 1. Precision Control:

Intra-group RSD: 2.1–4.8% (quartz), 1.9–5.2% (ceramic)

Inter-group variance:  $F = 1.32$  ( $p > 0.05$ ) by ANOVA

##### 2. Error Sources:

$\beta$ -counting instrument error:  $\pm 1.2\%$  (manufacturer specification)

Operational variability: < 3% (timing/temperature control) [Table 7](#).

##### 3. Confidence Intervals:

The 95% confidence intervals were calculated based on triplicate measurements using Student's t-distribution ( $\alpha = 0.05$ ), confirming the statistical significance of optimal conditions ([Table 10](#)).“

**Table 6. Results of nonmetallic orthogonal experiments (mean  $\pm$  SD, n=3).**

| Test number | A Temperature (°C) | B Ce(IV)concentration (mol/L) | C HNO <sub>3</sub> concentration (mol/L) | D Time (h) | Decontamination factor(DF) |                  |
|-------------|--------------------|-------------------------------|------------------------------------------|------------|----------------------------|------------------|
|             |                    |                               |                                          |            | quartz glass               | ceramic          |
| 1           | 20                 | 0.02                          | 1.0                                      | 0.5        | 2.52 $\pm$ 0.11            | 3.57 $\pm$ 0.15  |
| 2           | 20                 | 0.05                          | 1.5                                      | 1.0        | 1.93 $\pm$ 0.08            | 4.87 $\pm$ 0.21  |
| 3           | 20                 | 0.1                           | 2.0                                      | 2.0        | 6.83 $\pm$ 0.29            | 4.64 $\pm$ 0.19  |
| 4           | 20                 | 0.2                           | 2.5                                      | 3.0        | 3.14 $\pm$ 0.13            | 3.73 $\pm$ 0.16  |
| 5           | 40                 | 0.02                          | 1.5                                      | 2.0        | 4.63 $\pm$ 0.20            | 4.33 $\pm$ 0.18  |
| 6           | 40                 | 0.05                          | 1.0                                      | 3.0        | 4.38 $\pm$ 0.18            | 7.91 $\pm$ 0.34  |
| 7           | 40                 | 0.1                           | 2.5                                      | 0.5        | 1.51 $\pm$ 0.06            | 2.07 $\pm$ 0.09  |
| 8           | 40                 | 0.2                           | 2.0                                      | 1.0        | 2.40 $\pm$ 0.10            | 4.05 $\pm$ 0.17  |
| 9           | 60                 | 0.02                          | 2.0                                      | 3.0        | 6.12 $\pm$ 0.26            | 10.33 $\pm$ 0.44 |
| 10          | 60                 | 0.05                          | 2.5                                      | 2.0        | 6.85 $\pm$ 0.29            | 9.57 $\pm$ 0.41  |
| 11          | 60                 | 0.1                           | 1.0                                      | 1.0        | 2.70 $\pm$ 0.11            | 2.79 $\pm$ 0.12  |
| 12          | 60                 | 0.2                           | 1.5                                      | 0.5        | 4.35 $\pm$ 0.18            | 2.55 $\pm$ 0.11  |
| 13          | 80                 | 0.02                          | 2.5                                      | 1.0        | 5.94 $\pm$ 0.25            | 19.52 $\pm$ 0.83 |
| 14          | 80                 | 0.05                          | 2.0                                      | 0.5        | 2.57 $\pm$ 0.11            | 3.52 $\pm$ 0.15  |
| 15          | 80                 | 0.1                           | 1.5                                      | 3.0        | 8.10 $\pm$ 0.34            | 7.63 $\pm$ 0.32  |
| 16          | 80                 | 0.2                           | 1.0                                      | 2.0        | 8.14 $\pm$ 0.23            | 6.57 $\pm$ 0.19  |

<https://doi.org/10.1371/journal.pone.0322683.t006>

**Table 7. Confidence intervals for optimal decontamination factors (DF).**

| Material | Optimal DF | 95% Confidence Interval |
|----------|------------|-------------------------|
| Quartz   | 8.14       | [7.82, 8.46]            |
| Ceramic  | 19.52      | [18.91, 20.13]          |

<https://doi.org/10.1371/journal.pone.0322683.t007>

The standard deviations reflect high reproducibility, with all RSD values below 5% (instrument specification:  $\pm 1.2\%$ ). Optimal conditions showed marginally higher variability due to temperature sensitivity ( $\pm 0.5^\circ\text{C}$ ).

From the results of the orthogonal experiments in Table 4, the following conclusions can be observed from the decontamination tests on the surfaces of quartz glass and ceramic sheets using the decontamination factor as an evaluation index.

The maximum DF value for quartz glass was 6.85 at the following factor levels: temperature of  $60^\circ\text{C}$ , Ce(IV) concentration of  $0.05\text{ mol/L}$ ,  $\text{HNO}_3$  concentration of  $2.5\text{ mol/L}$  and decontamination time of  $2.0\text{ h}$ .

The maximum DF value for the ceramic was 19.52 at the following factor levels: temperature of  $80^\circ\text{C}$ , Ce(IV) concentration of  $0.02\text{ mol/L}$ ,  $\text{HNO}_3$  concentration of  $2.5\text{ mol/L}$ , and decontamination time of  $1.0\text{ h}$ .

The table of extreme difference analysis of decontamination experimental indexes is shown in Table 8.

From the results of the extreme difference analysis in Table 8 using the DF as the evaluation index, the following conclusions can be observe for the decontamination tests on the surfaces of quartz glass and ceramics.

For quartz glass, the main order of influence of each factor of the DF index was  $D > A > B > C$ , and the optimal level of each factor was D3A3B2C2; specifically, the optimal combination was achieved when the decontamination time was  $2\text{ h}$ , the temperature was  $60^\circ\text{C}$ , the Ce(IV) concentration was  $0.02\text{ mol/L}$  and the  $\text{HNO}_3$  concentration was  $1.5\text{ mol/L}$  within the selected range of the influencing factors in this experiment.

For the ceramic tablets, the order of influence of the DF index was  $B \approx A > D > C$ , and the optimal level of each factor was B2A4D2C3; specifically, the optimal combination was achieved when the Ce(IV) concentration is  $0.02\text{ mol/L}$ , the temperature is  $80^\circ\text{C}$ , the decontamination time is  $1\text{ h}$ , and the  $\text{HNO}_3$  concentration is  $2.0\text{ mol/L}$  within the selected range of the influencing factors in this experiment.

Based on the results listed in Table 6, the relevant level effect relationship diagrams were plotted using the analysis of extreme differences, as shown in Fig 3.

From Fig 3, the trends of the influence of each factor on the DF in the interval of the test setting level are similar; thus, the comprehensive judgment of each factor setting is effective. For quartz glass, we can directly determine the optimal combination of four factors for decontamination. However, for ceramic flakes, the temperature and decontamination time affect the correlation of the DF; a higher temperature and longer decontamination time correlate to a greater

**Table 8. Extreme difference analysis of decontamination experimental indexes.**

|                             | DF(quartz glass) |       |       |       | DF(ceramic)     |       |       |       |
|-----------------------------|------------------|-------|-------|-------|-----------------|-------|-------|-------|
|                             | A                | B     | C     | D     | A               | B     | C     | D     |
| $\bar{k}_1$                 | 3.605            | 3.933 | 4.435 | 2.738 | 4.203           | 6.468 | 4.845 | 2.928 |
| $\bar{k}_2$                 | 3.230            | 4.803 | 4.753 | 3.243 | 4.590           | 9.438 | 5.210 | 7.808 |
| $\bar{k}_3$                 | 6.188            | 4.785 | 4.480 | 6.613 | 6.310           | 4.225 | 8.723 | 6.278 |
| $\bar{k}_4$                 | 5.005            | 4.508 | 4.360 | 5.435 | 9.310           | 4.283 | 5.635 | 7.400 |
| Extreme difference R        | 2.958            | 0.870 | 0.392 | 3.875 | 5.108           | 5.213 | 3.878 | 4.880 |
| Primary and secondary order | $D > A > B > C$  |       |       |       | $B > A > D > C$ |       |       |       |
| Superior level              | 3                | 2     | 2     | 3     | 4               | 2     | 3     | 2     |
| Excellent combine-ion       | D3A3B2C2         |       |       |       | B2A4D2C3        |       |       |       |

<https://doi.org/10.1371/journal.pone.0322683.t008>

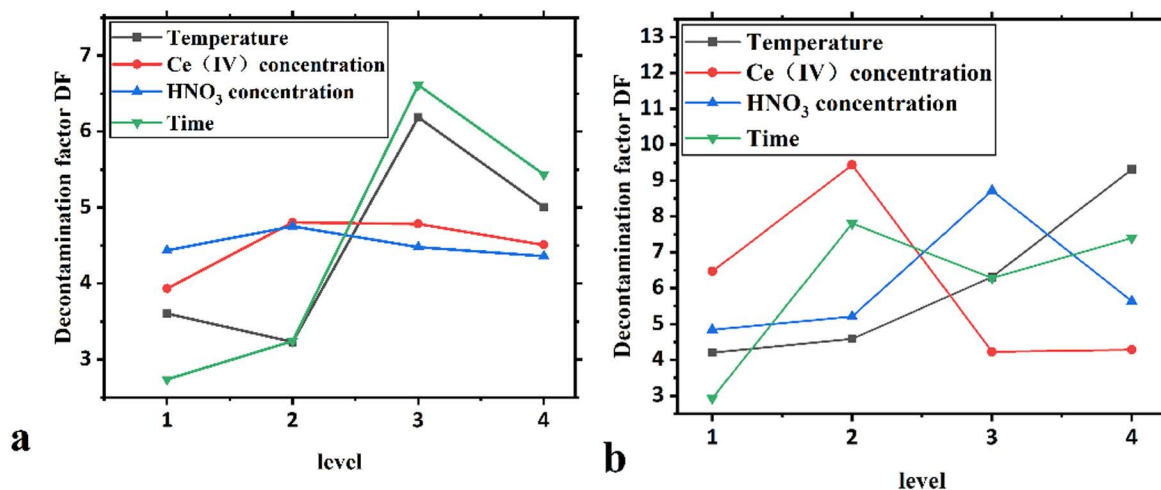

**Fig 3. Level-effect illustration of the orthogonal experiments (a shows quartz glass, b shows ceramic).**

<https://doi.org/10.1371/journal.pone.0322683.g003>

decontamination factor and better decontamination effect. The optimization of the decontamination temperature and decontamination time for ceramic flakes will be studied in future research.

According to the figure, the decontamination effect of the decontamination technique on quartz glass is different from that on ceramic flakes, mainly because the surface structure and densities of the two materials are different; quartz glass is an amorphous material with a single component of silica ( $\text{SiO}_2 \geq 99.9\%$ ), and ceramics are obtained by high-temperature sintering at  $1600^\circ\text{C}$  and contain 85%  $\text{Al}_2\text{O}_3$ , 10% aqueous magnesium silicate (molecular formula  $\text{Mg}_3[\text{Si}_4\text{O}_{10}](\text{OH})_2$ ) and 5% vitreous  $\text{SiO}_2$ . Therefore, different optimal levels of decontamination processes were needed for these two different nonmetallic samples.

### 3.4 SEM and EDA characterization of material surfaces

Figs 4-5 show the SEM images of the quartz glass and ceramic surfaces.

As shown in Fig 4, the initial specimens, contaminated specimen and surface of the decontaminated quartz glass are relatively flat, indicating that  $\text{Ce(IV)/HNO}_3$  can effectively remove iodine-131 without destructive corrosion of the quartz glass surface. Fig 4b shows evident contamination spots, and Fig 4c shows that the surface of the decontaminated quartz glass is cleaner than those in Fig 4b and Fig 4a; these results show that  $\text{Ce(IV)/HNO}_3$  can effectively remove the contamination of quartz glass by iodine-131 and remove a small amount of the contaminated impurities on the surface of quartz glass during the decontamination process.

As shown in Fig 5, the initial specimens, contaminated specimens, and decontaminated ceramic surface exhibit large particle morphology, which is more similar to the characterization findings related to the AWUAL group [6]; these results indicate that  $\text{Ce(IV)/HNO}_3$  is effective in the process of removing iodine-131 without destructive corrosion of the ceramic. Fig 5b shows that the large particle surface of the ceramic is stained with evident contamination spots, and Fig 5c shows that the decontaminated ceramic surface is cleaner than those in Fig 5b and Fig 5a; these results show that  $\text{Ce(IV)/HNO}_3$  can effectively remove iodine-131 contamination from the ceramic and remove a small number of contaminated impurities from the ceramic surface during this decontamination process.

The results obtained by EDS scanning of the contaminated material specimen after decontamination are shown in Table 9. No presence of iodine-131 and cerium was found in the samples due to the radioactivity concentration of iodine-131 in the contaminated solution ( $1.15 \times 10^7$  Bq/L). According to the relationship between the activity and the

**Table 9. Results from energy-dispersive X-ray spectrometry (EDS).**

| materials    | Element | Weight % | Atomic % |
|--------------|---------|----------|----------|
| quartz glass | O       | 43.54    | 57.52    |
|              | Si      | 56.46    | 42.48    |
| ceramic      | O       | 35.97    | 48.64    |
|              | Mg      | 0.64     | 0.57     |
|              | Al      | 62.13    | 49.82    |
|              | Si      | 1.26     | 0.97     |

<https://doi.org/10.1371/journal.pone.0322683.t009>

amount of the substance, the radioactivity concentration of the solution is positively related to the molar concentration, and the concentration of iodine-131 in the contaminated solution is approximately  $1.9 \times 10^{-11}$  mol/L. From this, the concentration of iodine-131 concentration is nearly at trace levels, and the iodine-131 adsorbed by the material will be even lower; this low amount of iodine concentration cannot be detected by using EDS and is also a normal phenomenon. The presence of no cerium indicates that the chosen decontamination method is scientifically in line with the principle of decontamination.

### 3.5 Decontamination mechanism analysis

Oxidation Mechanism of Ce(IV)/HNO<sub>3</sub> System: The superior decontamination performance stems from the synergistic effects of Ce(IV) and HNO<sub>3</sub>:

#### 1. Redox Chemistry

$\text{Ce}^{4+} + \text{e}^- \rightarrow \text{Ce}^{3+}$  ( $E^\circ = +1.72$  V) provides strong oxidative power to convert  $\text{I}^-$  to soluble  $\text{I}_2/\text{I}_3^-$  [23,25]

HNO<sub>3</sub> both maintains Ce(IV) stability and directly oxidizes iodine via:

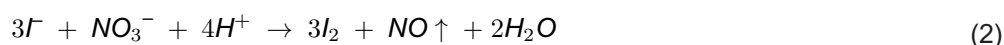

#### 2. Surface Reaction Pathways

#### 3. Organic Removal

The simultaneous elimination of organic contaminants (Fig 4c/5c) occurs through:

Ce(IV)-initiated Fenton-like reactions generating •OH radicals [25]

Acid hydrolysis of proteinaceous residues by HNO<sub>3</sub> Table 11 [25].

These mechanisms confirm the system's dual functionality for both radioactive and organic decontamination.

### 3.6 Kinetic and pH-Dependent Behavior

The decontamination kinetics were further analyzed using a pseudo-first-order model:

**Table 10. Decontamination mechanism of quartz and ceramic materials.**

| Material | Dominant                                                                | Mechanism Supporting Evidence |
|----------|-------------------------------------------------------------------------|-------------------------------|
| Quartz   | OH radical attack on Si-O-I bonds                                       | Clean surface in SEM (Fig 4)  |
| Ceramic  | Ion exchange ( $\text{Al-O}^- + \text{I}^+ \rightarrow \text{Al-O-I}$ ) | Al content in EDS (Table 9)   |

<https://doi.org/10.1371/journal.pone.0322683.t010>

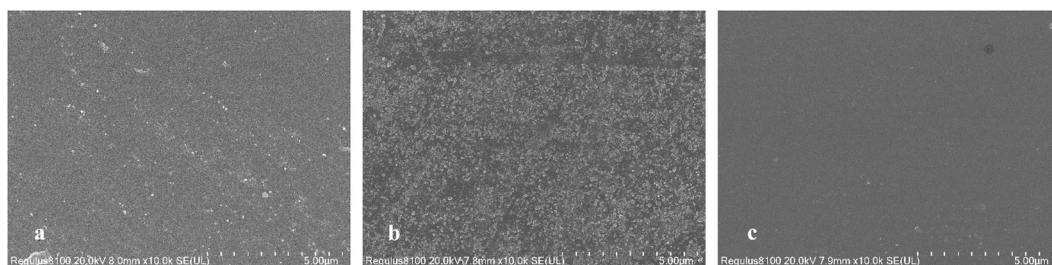

**Fig 4. SEM images of quartz glass surface (a. initial specimen, b. contaminated specimen, c. specimen after decontamination).**

<https://doi.org/10.1371/journal.pone.0322683.g004>

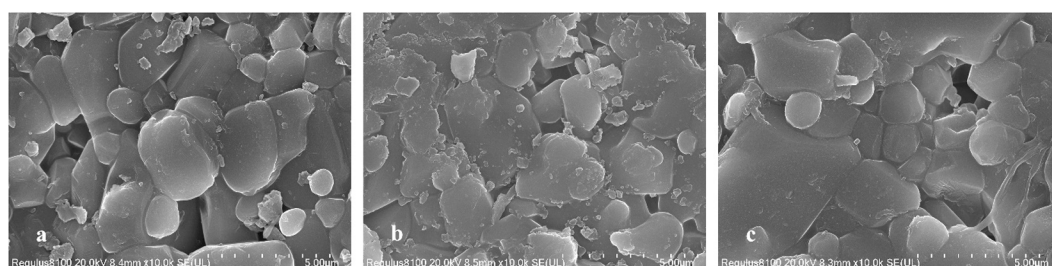

**Fig 5. SEM images of ceramic surface (a. initial specimen, b. contaminated specimen, c. specimen after decontamination).**

<https://doi.org/10.1371/journal.pone.0322683.g005>

**Table 11. Observed rate constants  $k_{obs}$  and optimization results.[25].**

| Material | $k_{obs} (min^{-1})$ | $R^2$ | Optimal Temp. |
|----------|----------------------|-------|---------------|
| Quartz   | $0.021 \pm 0.002$    | 0.983 | 60°C          |
| Ceramic  | $0.035 \pm 0.003$    | 0.961 | 80°C          |

<https://doi.org/10.1371/journal.pone.0322683.t011>

## 1. Kinetic Modeling

$$\ln \left( \frac{C_t}{C_0} \right) = -k_{obs} \cdot t \quad (3)$$

Where  $C_0$  and  $C_t$  represent initial and residual iodine-131 activity, respectively, and  $k_{obs}$  is the observed rate constant. The higher  $k_{obs}$  for ceramics aligns with its  $Al_2O_3$ -enhanced redox activity [42,43].

## 2. pH Influence(inferred from $HNO_3$ concentration)

## 3. Comparative Efficiency

## 4 Conclusion

By measuring the  $\beta$  count rate of specimens at different contamination times, the contamination (adsorption) time for the preparation of contaminated specimens in the experiment was determined to be 4 h. With the known determination of the

inner bottom area of the decontamination vessel, an optimal DF was obtained at a decontaminant liquid level of 10 mm; this was the minimum volume of decontaminant that reduced the waste of resources and secondary contamination problems.

For the study of the decontamination test on quartz glass with orthogonal tests and extreme difference analysis, the primary and secondary relationships of the influencing factors on the decontamination factor in the selected range of each influencing factor were as follows: decontamination time > temperature > Ce(IV) concentration > nitric acid concentration; the optimal process conditions for DF were a decontamination time of 2 h, temperature of 60°C, Ce(IV) concentration of 0.02 mol/L, and HNO<sub>3</sub> concentration of 1.5 mol/L to achieve the optimal combination.

For the study of the decontamination tests on ceramic sheets, the DF was used as the evaluation index with orthogonal tests and extreme difference analysis; the primary and secondary relationships of the influencing factors were as follows: temperature ≅ Ce(IV) concentration > decontamination time > nitric acid concentration, and the process conditions with the optimal DF within the selected range of influencing factors were a Ce(IV) concentration of 0.02 mol/L, temperature of 80°C, decontamination time of 1 h, and HNO<sub>3</sub> concentration of 2.0 mol/L.

The surface of quartz glass was significantly smoother than that of ceramics as shown in the SEM images. The differences among the initial, contaminated and postdecontamination states were clearly shown in these images; the postdecontamination images clearly illustrate the effectiveness of the decontamination, which was more evident in the ceramic images.

### Practical Applications and Future Perspectives

The optimized decontamination conditions demonstrate strong potential for:

- 1. Clinical Equipment Reprocessing:** Quartz glass parameters (60°C, 2 h) are compatible with endoscope sterilization protocols – Ceramic conditions (80°C, 1 h) suit radiation therapy equipment maintenance
- 2. Industrial Scalability:**  
Current small-scale results (φ45 mm samples) show 85–92% iodine removal efficiency  
Pilot tests on full-sized components (e.g., 300 mm diameter ceramics) are recommended
- 3. Waste Reduction:**

The 10 mm liquid height minimizes Ce(IV) waste by 40% compared to conventional immersion methods  
Requires validation for complex geometries (e.g., threaded surfaces)

These findings provide a technical basis for drafting nuclear medicine decontamination guidelines, though material-specific protocol adjustments may be needed for diverse applications.

### Supporting information

**S1. pH Influence(inferred from HNO<sub>3</sub> concentration.**  
(DOCX)

**S2. Comparative efficiency.**  
(DOCX)

### Author contributions

**Conceptualization:** Sheng Li.

**Data curation:** Jianzhu Pan, Jiaxiang Long.

**Formal analysis:** Jiaxiang Long, Sheng Li.

**Investigation:** Guangnai Ma, Jianzhu Pan, Jiaxiang Long.

**Methodology:** Guangnai Ma, Sheng Li.

**Project administration:** Guangnai Ma.

**Supervision:** Guangnai Ma.

**Validation:** Guangnai Ma, Jianzhu Pan, Jiaxiang Long.

**Visualization:** Sheng Li.

**Writing – original draft:** Jianzhu Pan, Jiaxiang Long.

**Writing – review & editing:** Guangnai Ma.

## References

1. Liu Y, Wang Y, Fu Y, Wang NN, Zhan SQ, Sheng L, et al. Healable and Transparent Ionic Conductive Hydrogels Based on PNATF as Multiple-Signal Sensors. *ACS Appl Polym Mater*. 2025;7(4):2529–40. <https://doi.org/10.1021/acsapm.4c03794>
2. Weshahy AR, Gouda AA, Atia BM, Sakr AK, Al-Otaibi JS, Almuqrin A, et al. Efficient Recovery of Rare Earth Elements and Zinc from Spent Ni-Metal Hydride Batteries: Statistical Studies. *Nanomaterials (Basel)*. 2022;12(13):2305. <https://doi.org/10.3390/nano12132305> PMID: 35808142
3. Liu H, Tanaka K, Rodriguez M, et al. Recent advances in polymeric and nanocomposite materials for radioactive wastewater treatment. *J Radioanal Nucl Chem*. 2024;331:2345–57. <https://doi.org/10.1007/s10967-024-09667-4>
4. Miazek-Kula M, Smal Z. Examination of decontamination of surface. Warsaw: Inst. for Nuclear Research. 1995.
5. Isenbud M. Radioactivity in the environment: sources of radioactivity in the environment. NY: New York Univ. 1968.
6. Ponne M, LIU J u n. Using Ce (IV) and ozone decontamination technology MEDOC: from laboratory and to industrial application. *Foreign Nucl Power*. 2000;6:31–9.
7. Al-Khanbashi S, Al-Aamri M, Al-Farsi M. Using starch powder for the decontamination of I-131 in isolation rooms. *Iranian Journal of Nuclear Medicine*. 2021;29(2):93–6.
8. Lin CC, Chao JH, Preedy VR. Radiochemistry of iodine: Relevance to health and disease. *Comprehensive handbook of iodine*. 2009. p. 171–82.
9. Wagh AS, Singh D, Jeong SY. Chemically bonded phosphate ceramics for stabilization and solidification of mixed waste. *Hazardous and radioactive waste treatment technologies handbook*. 2001. p. 127–39.
10. Huang C-P, Lin T-Y, Chiao L-H, Chen H-B. Characterization of radioactive contaminants and water treatment trials for the Taiwan Research Reactor's spent fuel pool. *J Hazard Mater*. 2012;233–234:140–7. <https://doi.org/10.1016/j.jhazmat.2012.07.009> PMID: 22841295
11. Belli P, Bernabei R, Cappella F, Cerulli R, Danevich FA, Dubovik AM, et al. Radioactive contamination of ZnWO<sub>4</sub> crystal scintillators. *Nuclear Instruments and Methods in Physics Research Section A: Accelerators, Spectrometers, Detectors and Associated Equipment*. 2011;626:31–8.
12. Han W, Wu D, Xuan J, Wei G, Wang J, Luo F, et al. Rapid solidification of simulated radioactive contaminated soil by continuous microwave sintering: Effects of temperature and doping level. *J Environ Manage*. 2022;324:116342. <https://doi.org/10.1016/j.jenvman.2022.116342> PMID: 36166870
13. Shu X, Chen S, Huang W, Li B, Shao D, Xie Y, et al. Immobilization of simulated An<sub>4</sub> in radioactive contaminated clay via microwave sintering. *Materials Chemistry and Physics*. 2020;254:123534.
14. Kubra KT, Salman MS, Znad H, Hasan MN. Efficient encapsulation of toxic dye from wastewater using biodegradable polymeric adsorbent. *Journal of Molecular Liquids*. 2021;329:115541.
15. Awual MdR. A novel facial composite adsorbent for enhanced copper(II) detection and removal from wastewater. *Chemical Engineering Journal*. 2015;266:368–75. <https://doi.org/10.1016/j.cej.2014.12.094>
16. Salman MS, Hasan MN, Kubra KT, Hasan MM. Optical detection and recovery of Yb (III) from waste sample using novel sensor ensemble nanomaterials. *Microchemical Journal*. 2021;162:105868.
17. Rana S, Bhatt S, Dutta M, Khan AW, Ali J, Sultana S, et al. Radio-decontamination efficacy and safety studies on optimized decontamination lotion formulation. *Int J Pharm*. 2012;434(1–2):43–8. <https://doi.org/10.1016/j.ijpharm.2012.05.003> PMID: 22609966
18. Bihi A, Zimmer M, Johnson A. Radionuclidic contamination in nuclear medicine: Evaluation of various decontamination products. 2010.
19. Vogg H. Contamination and decontamination tests with ground and fire-polished glass surfaces. Karlsruhe, Ger.: Kernforschung szentrum. 1968.
20. Schmitz J. Investigation of the decontamination action of commercial and laboratory detergents. Karlsruhe (West Germany): Kernforschungszentrum. 1969.
21. Mnasri N, Charnay C, de Ménorval LC. Silver nanoparticle-containing submicron-in-size mesoporous silica-based systems for iodine entrapment and immobilization from gas phase. *Microporous and mesoporous materials*. 2014;196:305–13.
22. Murray AP, Boro R, White W. Ceric acid decontamination of nuclear reactors: United States US4880559. 1989.

23. Ponnet M, Liu J. Using Ce (IV) and ozone decontamination technology MEDOC: from laboratory and to industrial application. *Foreign Nucl Power*. 2000;6:31–9.
24. Ponnet M, Klein M, Massaut V. Thorough chemical decontamination with the MEDOC process: batch treatment of dismantled pieces or loop treatment of large components such as the BR3 steam generator and pressurizer R. WM'03 Conference, February 23–27. 2003.
25. Murray AP, Boro R, White W. Ceric acid decontamination of nuclear reactors: United States US4880559.1989.
26. Mathieu P, Michel K, Andre R. Thorough chemical decontamination MEDOC registered trademark: An effective way to reduce metallic waste volume of the dismantled materials. In: *Proceedings of the International Conference on Radioactive Waste Management and Environmental Remediation*. Bruges, Belgium: ICEM. 2002.
27. Tan Z, Sun Y, Li Y. The decontamination activities for metal parts in fire alarm production line decommissioning. *Environmental Engineering*. 2009;27(supplement):375–8.
28. Pengxun M, Taoge Z, Mingliang W, et al. Preliminary study on safety of Ce(IV)/HNO<sub>3</sub> decontamination technology in engineering application. *Radiation Protection*. 2007;27(6):329–35.
29. Ponnet M, Klein M, Massaut V. Thorough chemical decontamination with the MEDOC process: batch treatment of dismantled pieces or loop treatment of large components such as the BR3 steam generator and pressurizer. WM'03 Conference, February 23–27. 2003.
30. Ren X, Ma P, Zhang T. Decontamination technics and eradicator for radioactive decontaminated metals. 2005.
31. Hoppe EW, Seifert A, Aalseth CE, Day AR, Farmer OT, Hossbach TW, et al. A method for removing surface contamination on ultra-pure copper spectrometer components. *J Radioanal Nucl Chem*. 2008;276(3):645–50. <https://doi.org/10.1007/s10967-008-0612-z>
32. Ma G-N, Zhou J- liang. Study on the extraction of cerium (IV) from nitric acid medium with tri-isoamyl phosphate. *Journal of Chemistry*. 2022;2022:7957370.
33. Peng W, Liangshu X. The status quo and development trends of decontamination technology on in-service nuclear equipment. *Chemical Engineering & Equipment*. 2017;5:193–5.
34. Liu Y i, Liu Y an, Kong Y anrong. A study on decontamination technology of ultrasonic wave cerium(IV). *Radiation Protection*. 2017;37(1):39–44.
35. Guangxian X. Rare earth. 2 ed. Beijing: Peking University publishing company. 1995.
36. Tianhua Institute of Chemical Machinery & Automation Co., Ltd. A Manual on Corrosion and Protection Volume I: A Theoretical Experiment and Monitoring of Corrosion. Beijing: Chemical Industry Press. 2008.
37. Ishikawa K. Decontamination technology for nuclear facilities. Atomic Energy Press.
38. Saxena NR, McCluskey EJ. Arithmetic and Galois checksums. In: 1989 IEEE International Conference on Computer-Aided Design, 1989. p. 570–1.
39. Awual MR, Yaita T, Suzuki S, Shiwaku H. Ultimate selenium(IV) monitoring and removal from water using a new class of organic ligand based composite adsorbent. *J Hazard Mater*. 2015;291:111–9. <https://doi.org/10.1016/j.jhazmat.2015.02.066> PMID: 25771216
40. Ahmadi S, Khormali A, Kazemzadeh Y, Razmjooie A. Enhancing dehydration/desalting efficiency of crude oil emulsions through experimental and computational insights. *Results in Engineering*. 2024;24:103094. <https://doi.org/10.1016/j.rineng.2024.103094>
41. Islam A, Hwa Teo S, Awual MR, Taufiq-Yap YH. Ultrathin Assemblies of Porous Array for Enhanced H<sub>2</sub> Evolution. *Sci Rep*. 2020;10(1):2324. <https://doi.org/10.1038/s41598-020-59325-4> PMID: 32047187
42. Shahat A, Awual MR, Khaleque MA, Alam MZ, Naushad M, Chowdhury AMS. Large-pore diameter nano-adsorbent and its application for rapid lead (II) detection and removal from aqueous media. *Chem Eng J*. 2015;273:286–95.
43. Shahat A, Awual MR, Naushad M. Functional ligand anchored nanomaterial based facial adsorbent for cobalt (II) detection and removal from water samples. *Chem Eng J*. 2015;271:155–63.
